# Supplementary material for: JUN dependency in distinct early and late BRAF inhibition adaptation states of melanoma
Source: PubMed Central journal article supplement (PMC5012007; doi:10.1038/celldisc.2016.28), 2016-09-06
Supplement: celldisc201628-s7.pdf [file celldisc201628-s7.pdf]

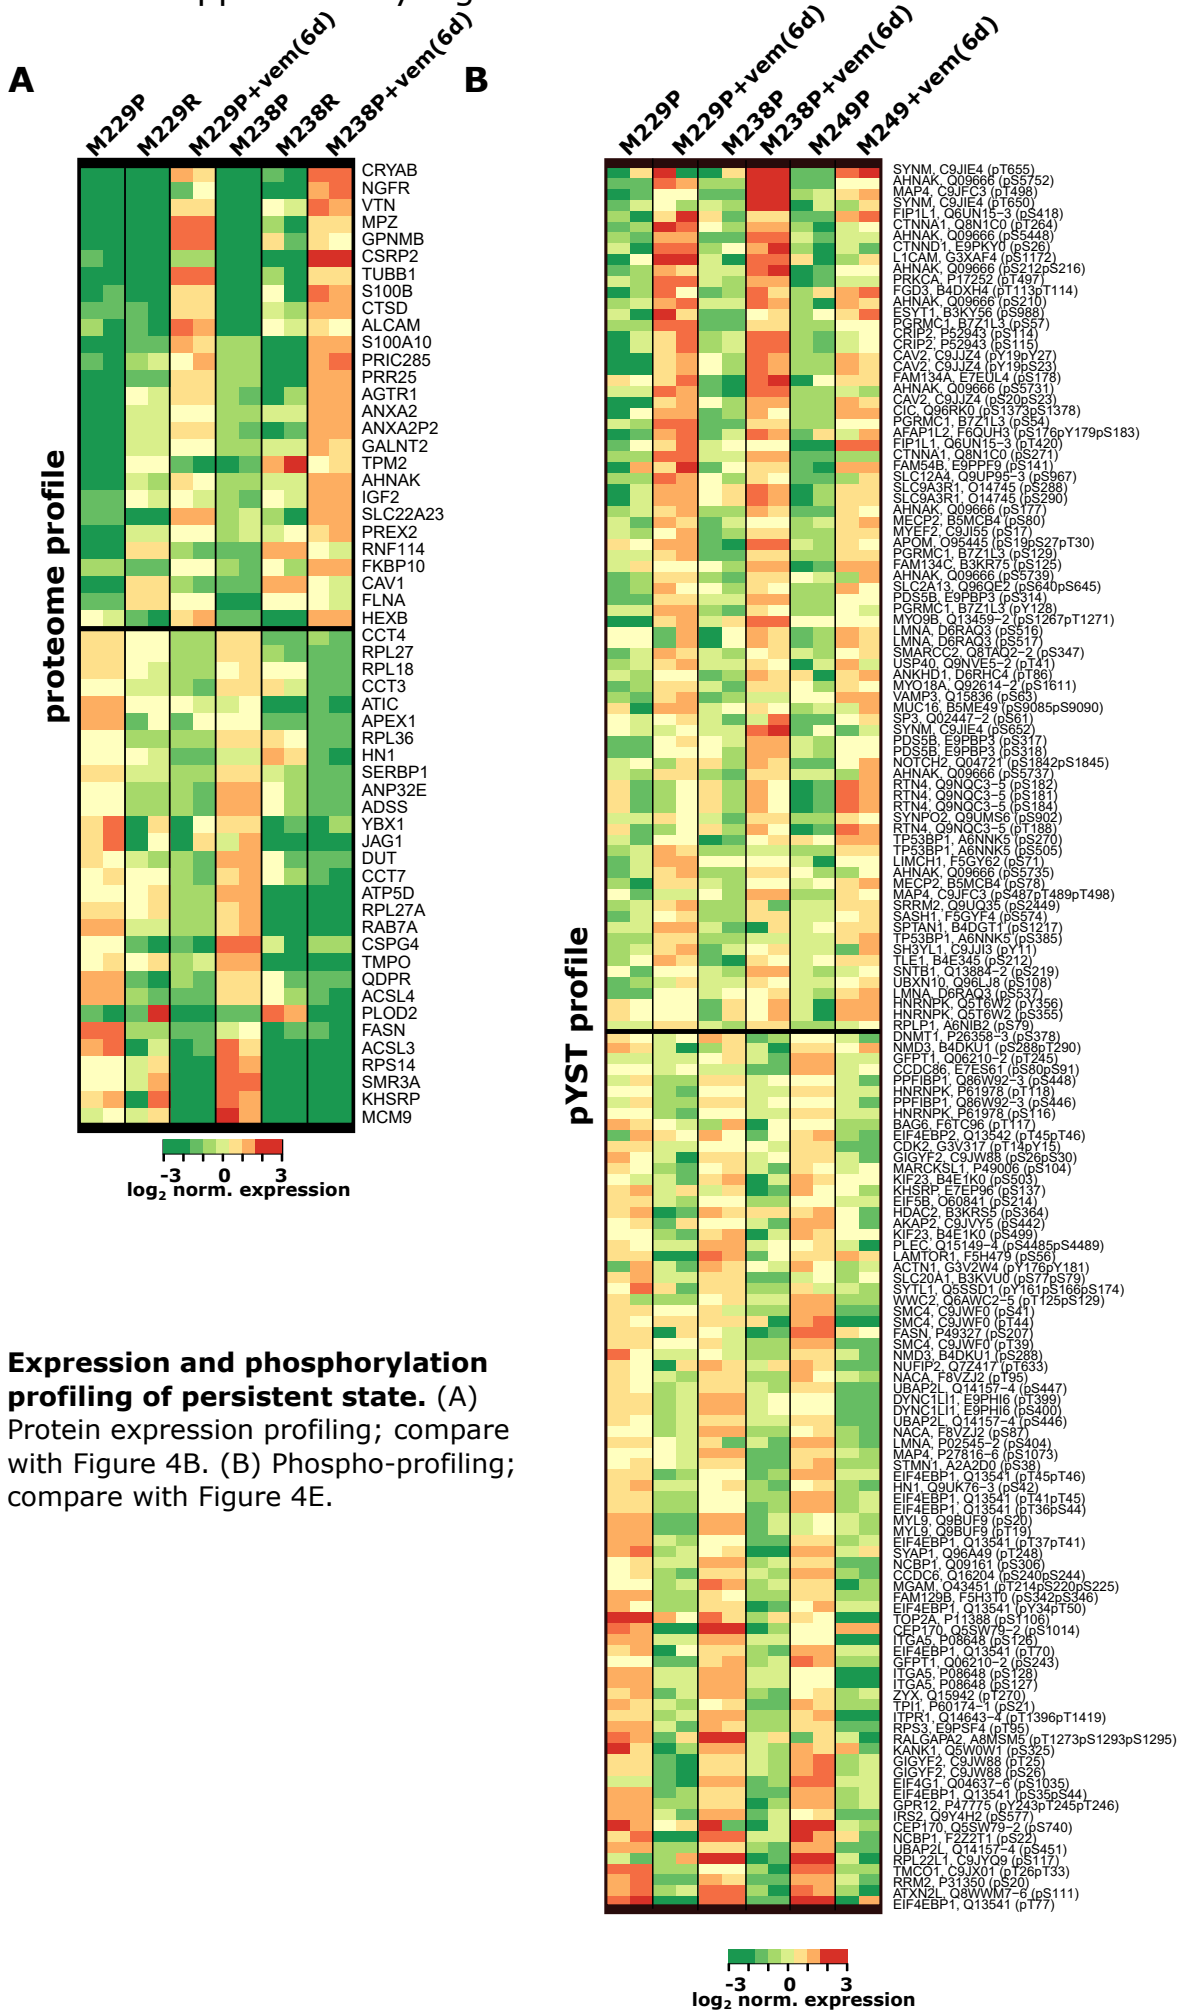

**Expression and phosphorylation profiling of persistent state.** (A) Protein expression profiling; compare with Figure 4B. (B) Phospho-profiling; compare with Figure 4E.
