# Supplementary material for: JUN dependency in distinct early and late BRAF inhibition adaptation states of melanoma
Source: PubMed Central journal article supplement (PMC5012007; doi:10.1038/celldisc.2016.28), 2016-09-06

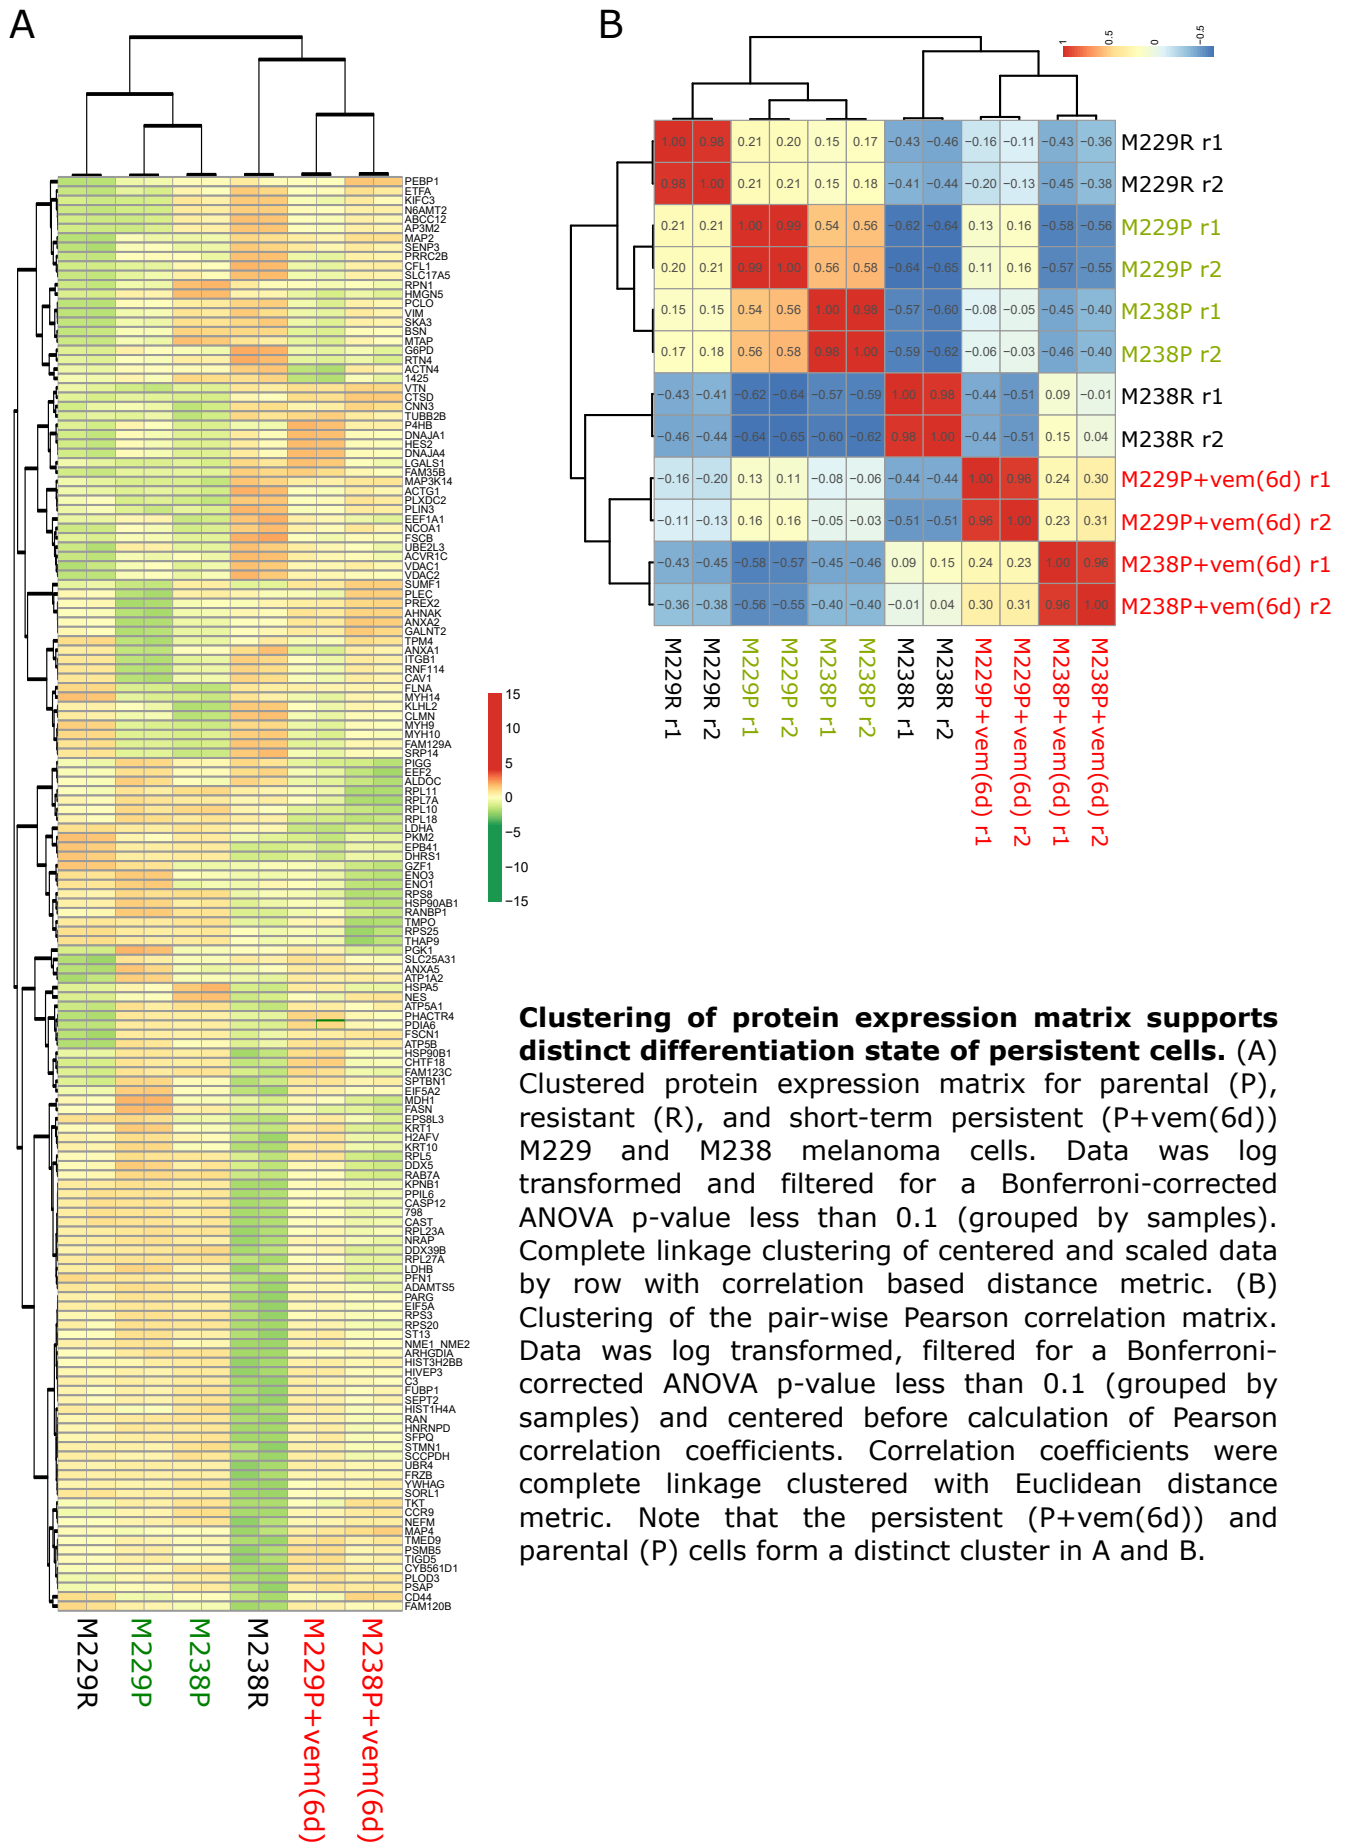

Supplement: celldisc201628-s8.pdf [file celldisc201628-s8.pdf]
