# Supplementary material for: JUN dependency in distinct early and late BRAF inhibition adaptation states of melanoma
Source: PubMed Central journal article supplement (PMC5012007; doi:10.1038/celldisc.2016.28), 2016-09-06
Supplement: celldisc201628-s9.pdf [file celldisc201628-s9.pdf]

A

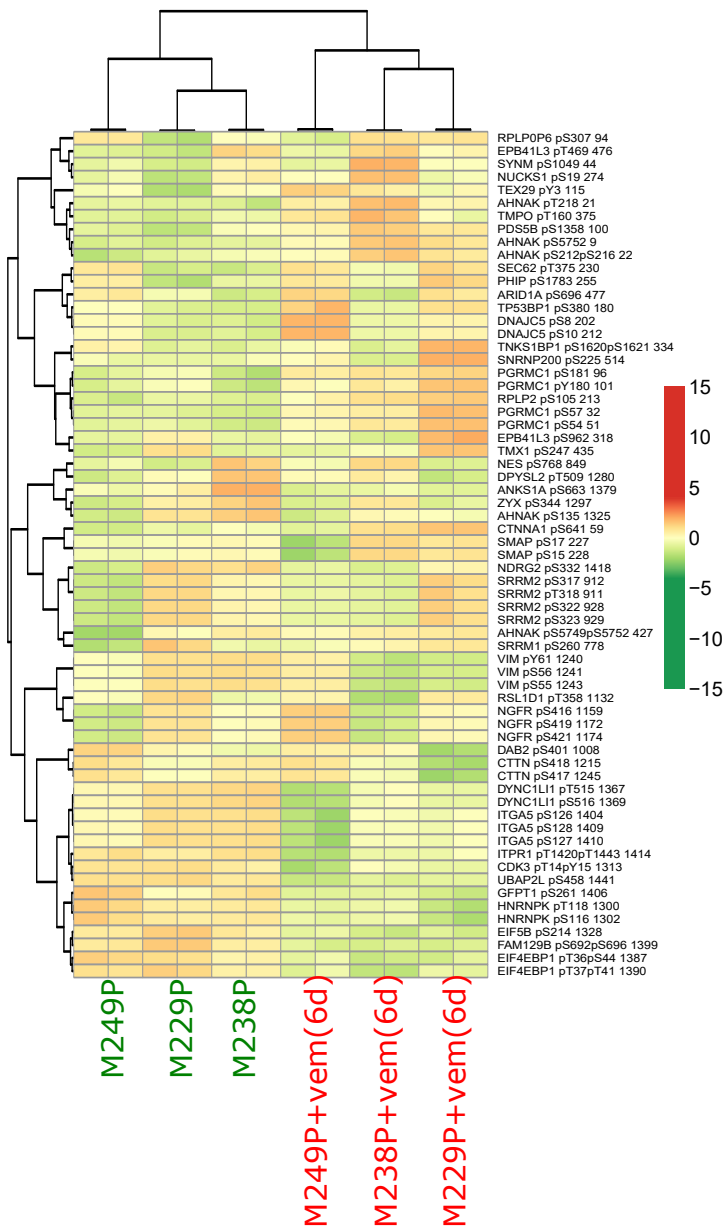

B

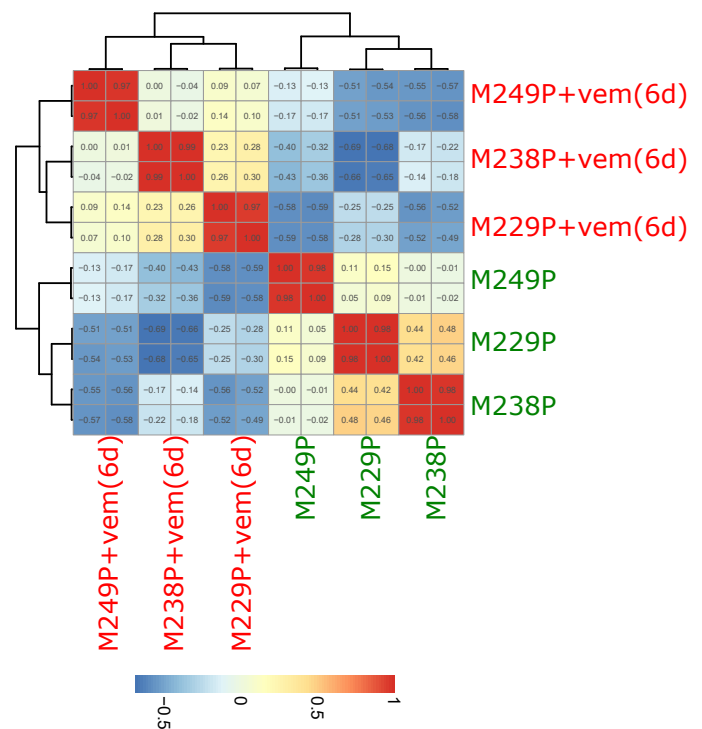

**Clustering of phosphorylation site abundance matrix supports distinct signaling state of persistent cells.** (A) Clustered phosphorylation site abundance matrix for parental (P) and short-term persistent (S) M229, M238, and M249 melanoma cells. Quantile normalized data was log-transformed and filtered for a Bonferroni-corrected ANOVA p-value less than 0.1 (grouped by samples). Complete linkage clustering of centered and scaled data by row with correlation based distance metric. (B) Clustering of the pair-wise Pearson correlation matrix. Quantile normalized data was log transformed, filtered for a Bonferroni-corrected ANOVA p-value less than 0.1 (grouped by samples) and centered before calculation of Pearson correlation coefficients. Correlation coefficients were complete linkage clustered with Euclidean distance metric.
