# Supplementary material for: JUN dependency in distinct early and late BRAF inhibition adaptation states of melanoma
Source: PubMed Central journal article supplement (PMC5012007; doi:10.1038/celldisc.2016.28), 2016-09-06
Supplement: celldisc201628-s10.pdf [file celldisc201628-s10.pdf]

# Titz et al. Supplementary Figure S9

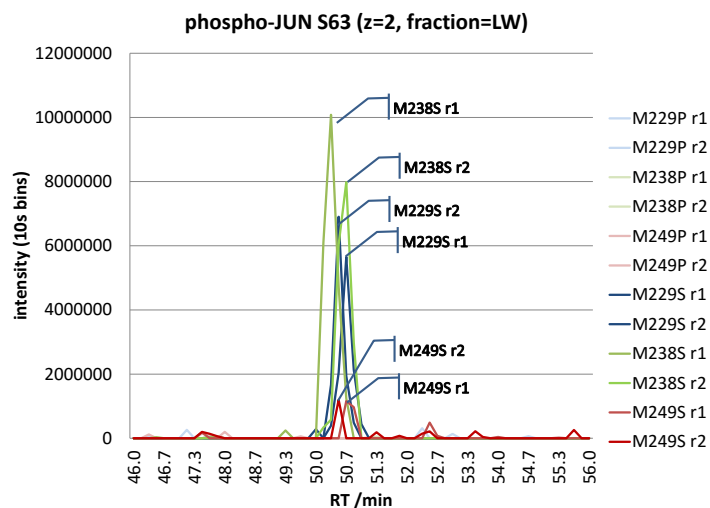

**Persistent cells show higher expression of phospho-JUN S63 peptide.** Selected extracted ion chromatogram shown for phospho-JUN S63 peptide in short-term vemurafenib phospho-profiling experiment (fraction LW, charge state (z) = 2).
