# Supplementary material for: JUN dependency in distinct early and late BRAF inhibition adaptation states of melanoma
Source: PubMed Central journal article supplement (PMC5012007; doi:10.1038/celldisc.2016.28), 2016-09-06
Supplement: celldisc201628-s11.pdf [file celldisc201628-s11.pdf]

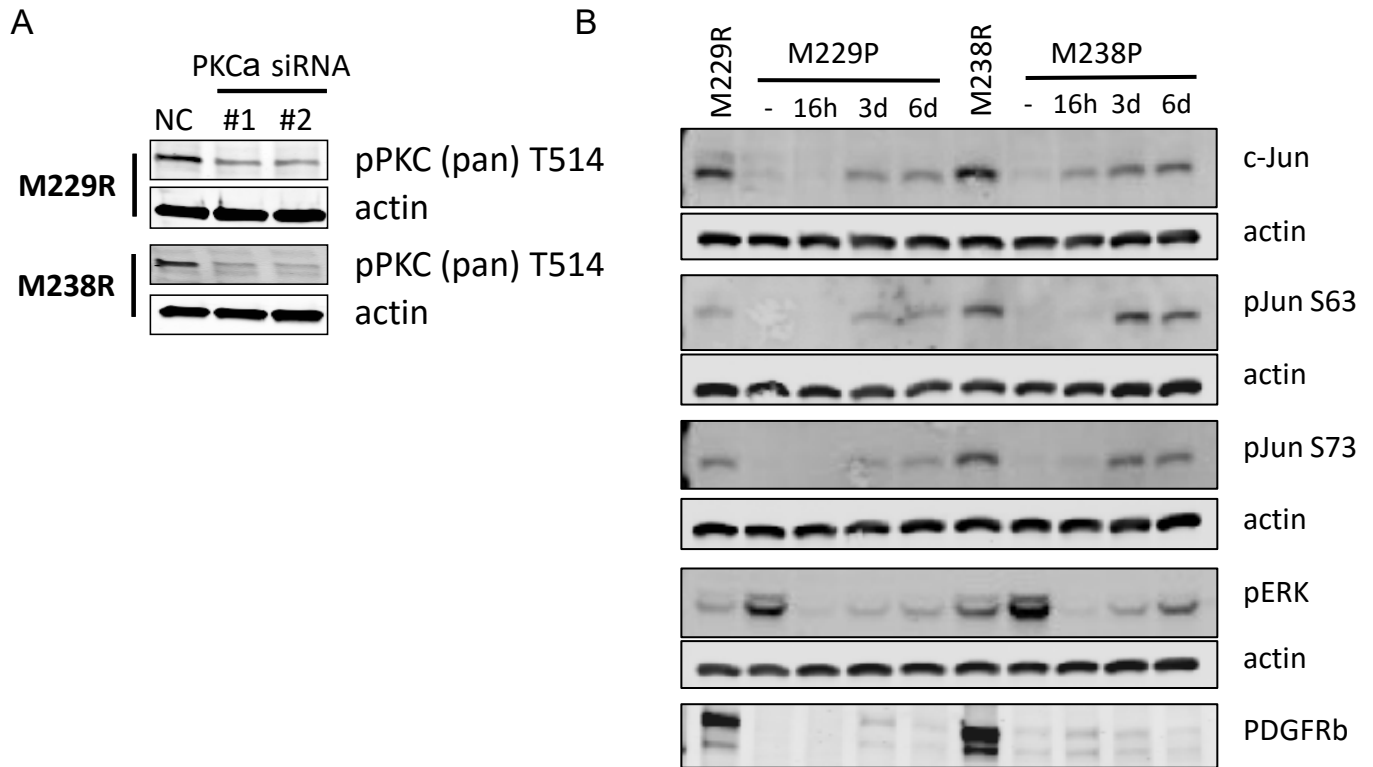

**PKC isoform analysis and extended vemurafenib treatment kinetics.** (A) The upregulated PKC isoform in M229R and M238R corresponds to PKC  $\beta$ . The detected upregulated PKC isoform was successfully targeted with two independent PKC  $\beta$ -specific siRNAs (#1 = GGGAUCUGAAGUUAGAUAAATT, #2 = GCUGGUUAUUGCUAACAUATT, NC = negative scramble control, obtained from Shanghai GenePharma, Shanghai, China). (B) Extended kinetics compared to Figure 5E. M229P and M238P were left untreated (-) or treated with 1uM vemurafenib/PLX4032 (vem) for 3h, 16h, 3 days, and 6 days and compared by Western blot with the fully resistant cells (M229R and M238R).
