# Supplementary material for: JUN dependency in distinct early and late BRAF inhibition adaptation states of melanoma
Source: PubMed Central journal article supplement (PMC5012007; doi:10.1038/celldisc.2016.28), 2016-09-06
Supplement: celldisc201628-s12.pdf [file celldisc201628-s12.pdf]

**A**

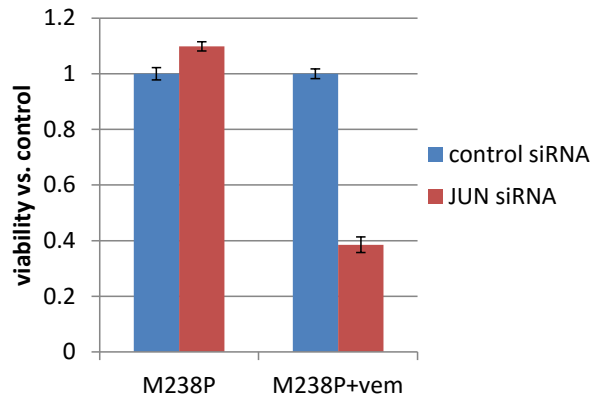

**B**

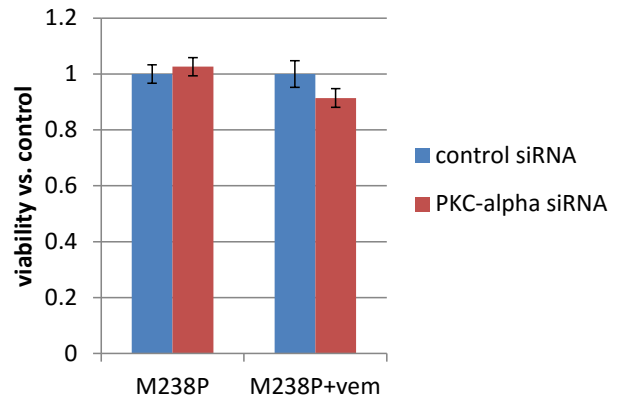

**JUN knock-down not PKC-alpha knockdown is effective co-treatment option.** Effect on cell viability of vemurafenib and JUN or PKC-alpha siRNA knockdown co-treatment for parental (M238P) and vemurafenib co-treated M238P cells (M238P+vem). Cell viability was assessed after 3 days by a MTS assay. (A) JUN knockdown. (B) PKC-alpha knockdown
