# Supplementary material for: JUN dependency in distinct early and late BRAF inhibition adaptation states of melanoma
Source: PubMed Central journal article supplement (PMC5012007; doi:10.1038/celldisc.2016.28), 2016-09-06
Supplement: celldisc201628-s16.pdf [file celldisc201628-s16.pdf]

**A**

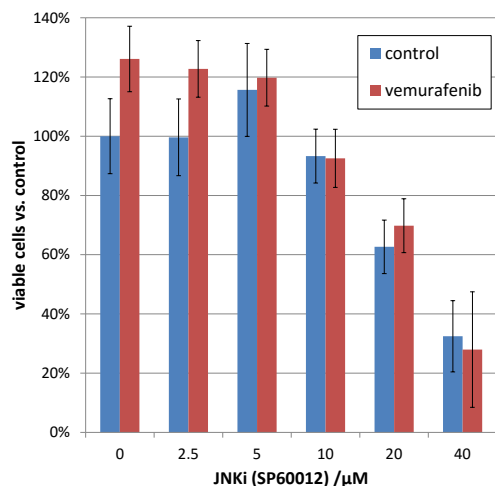

**B**

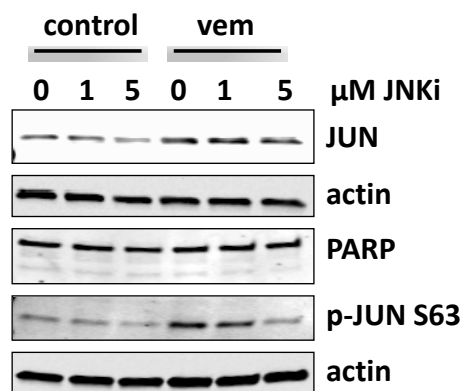

**Pharmacological inhibition of c-Jun N-terminal kinases (JNKs) is ineffective at targeting the persistent state.** (A) Combining JNK inhibitor (JNKi, SP600125) and vemurafenib treatment of M238P cells does not show synergistic or additive effect in viability experiment. Cells were pretreated with indicated concentration of JNKi (or DMSO control) and 1  $\mu\text{M}$  vemurafenib (or DMSO control). General toxicity of the JNK inhibitor (JNKi) is observed only above 10  $\mu\text{M}$ . (B) JNKi effectively suppresses JUN phosphorylation in M238P cells. Western blot of M238P cells treated with increasing concentrations of JNKi (0, 1, 5  $\mu\text{M}$ ) and with (vem) or without (control) 1  $\mu\text{M}$  vemurafenib. Note that suppression of JUN phosphorylation is observed at lower concentration than for toxicity in (A).
